# Supplementary material for: Tumor pH and intracellular reduction responsive polypeptide nanomedicine with a sheddable PEG corona and a disulfide-cross-linked core
Source: Royal Society of Chemistry journal article supplement (doi:10.1039/c8py00579f), 2018-01-01
Supplement: c8py00579f1.pdf [file c8py00579f1.pdf]

## Supporting Information

### Tumor pH and Intracellular Reduction Responsive Polypeptide Nanomedicine with Sheddable PEG Corona and Disulfide-Cross-Linked Core

Yue Ding<sup>1</sup>, Chang Du<sup>1</sup>, Jiwen Qian<sup>1</sup>, Linzhu Zhou<sup>1</sup>, Yue Su<sup>1</sup>, Rong Zhang<sup>2,\*</sup>, Chang-Ming Dong<sup>1,2,\*</sup>

<sup>1</sup>School of Chemistry and Chemical Engineering, Shanghai Key Laboratory of Electrical Insulation and Thermal Aging, Shanghai Jiao Tong University, Shanghai 200240, P. R. China

<sup>2</sup>Joint Research Center for Precision Medicine, Shanghai Jiao Tong University Affiliated Sixth People's Hospital South Campus, Shanghai Fengxian Central Hospital, Shanghai 201400, P. R. China

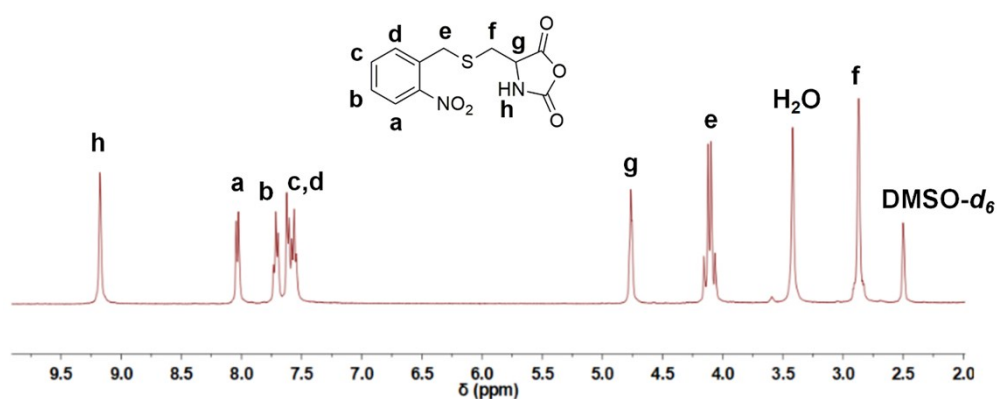

**Fig. S1** Synthesis and <sup>1</sup>H NMR spectra of L-NBC-NCA (DMSO-*d*<sub>6</sub>).

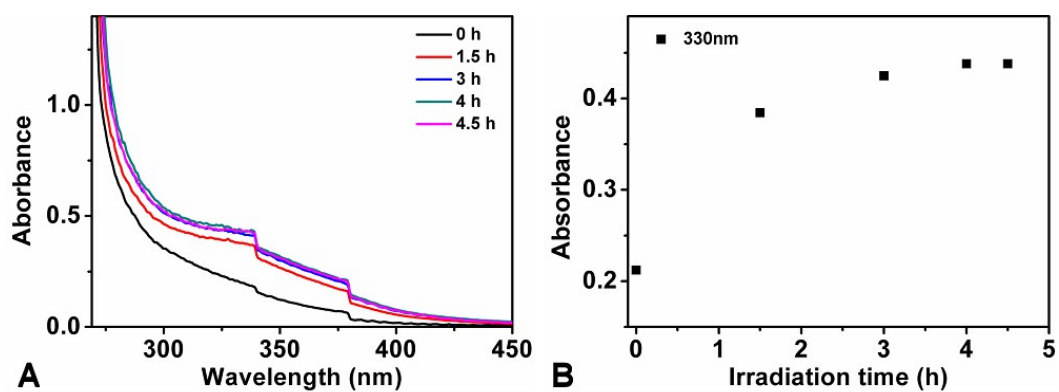

**Fig. S2** UV-vis data of 0.5 mg/mL CCL<sub>21</sub> nanoparticles in DMF/CH<sub>3</sub>CN (v: v = 4: 1) solution after 365 nm irradiation of different times (A) and the absorbance at 330 nm on irradiation time (B).

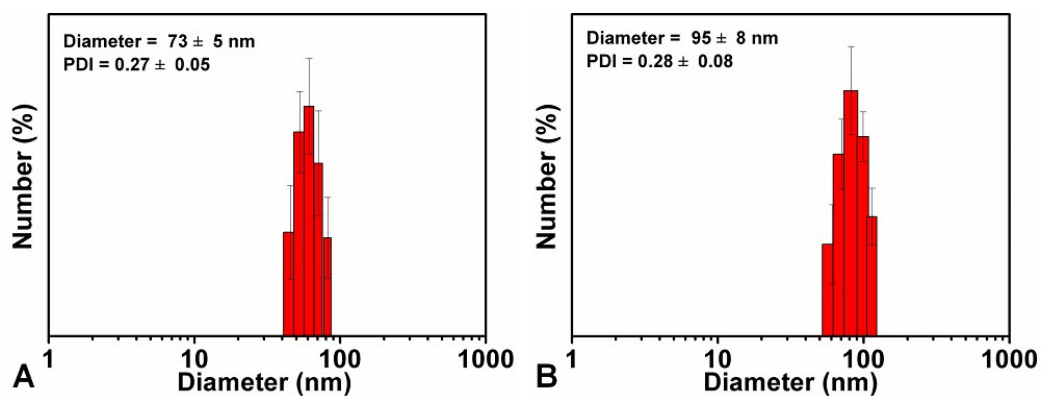

**Fig. S3** DLS data for both the NCL<sub>21</sub> (A) and NCL<sub>79</sub> (B) nanoparticles.

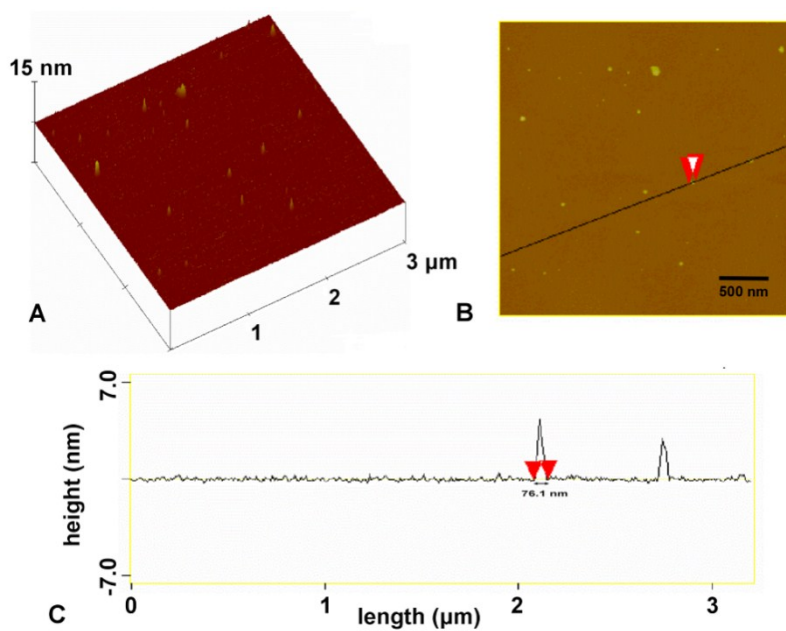

**Fig. S4** The AFM images of CCL<sub>79</sub> nanoparticles.

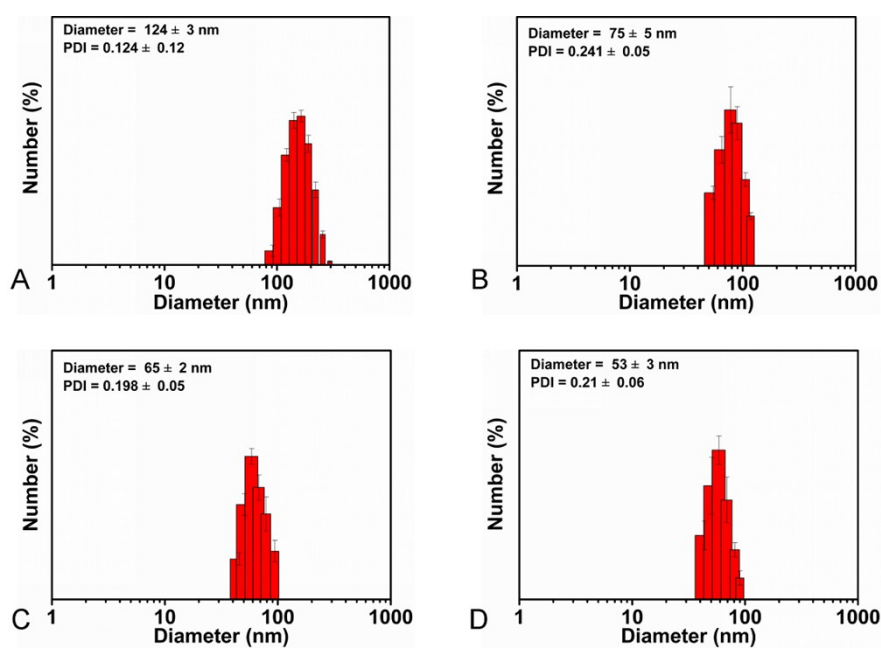

**Fig. S5** DLS data for CCL<sub>21</sub> nanoparticles when incubated at pH 7.4 (A), pH 7.4 + 10 mM DTT (B), pH 6.5 (C) and pH 6.5 + 10 mM DTT (D) for 24h.

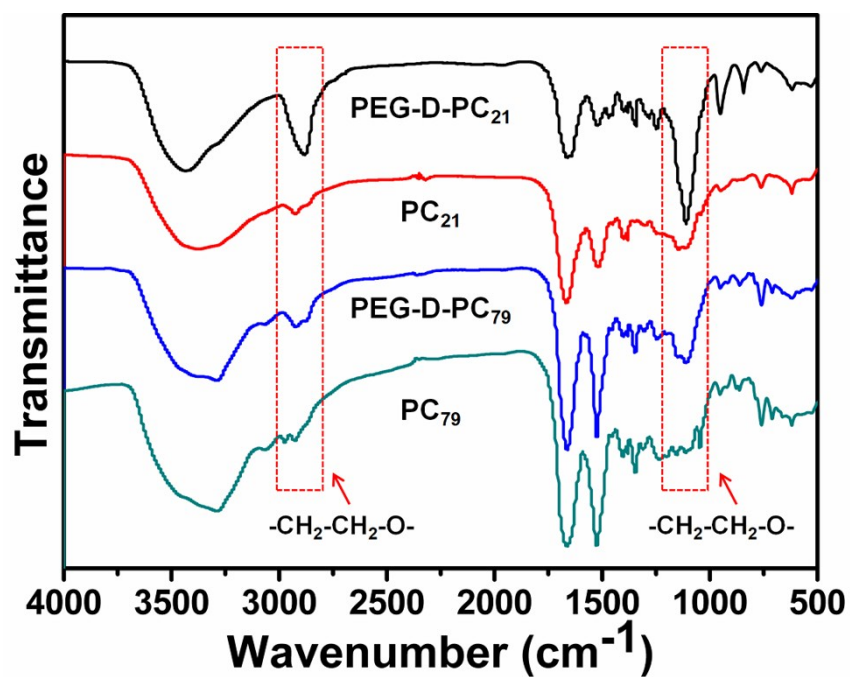

Fig. S6 FT-IR spectra of PEG-D-PC and the residual PC.

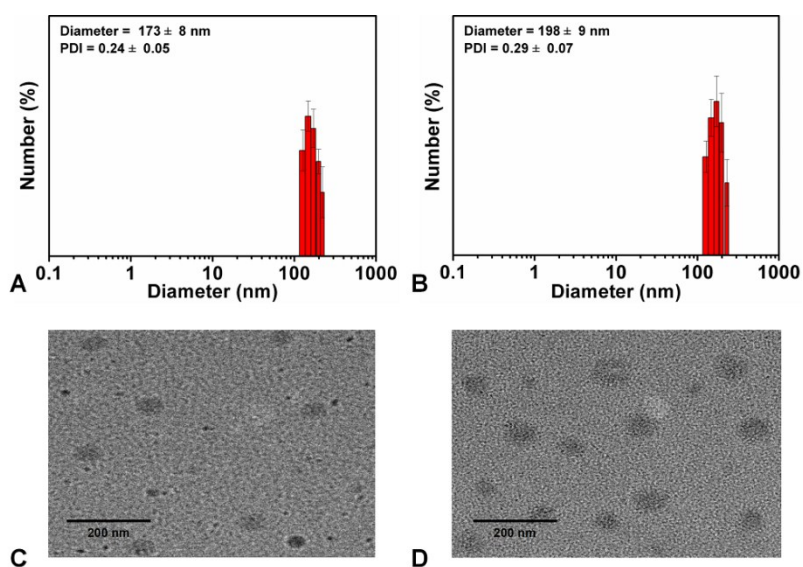

Fig. S7 DLS and TEM data for both the CPT-loaded CCL<sub>21</sub> (A, C) and CCL<sub>79</sub> (B, D) nanoparticles.
